# Supplementary material
Source: PubMed Central journal article supplement (PMC11028496)
Supplement: 262_2012_1384_MOESM1_ESM.pdf [file 262_2012_1384_MOESM1_ESM.pdf]

## Supplementary Data

### Supplemental Figure 1

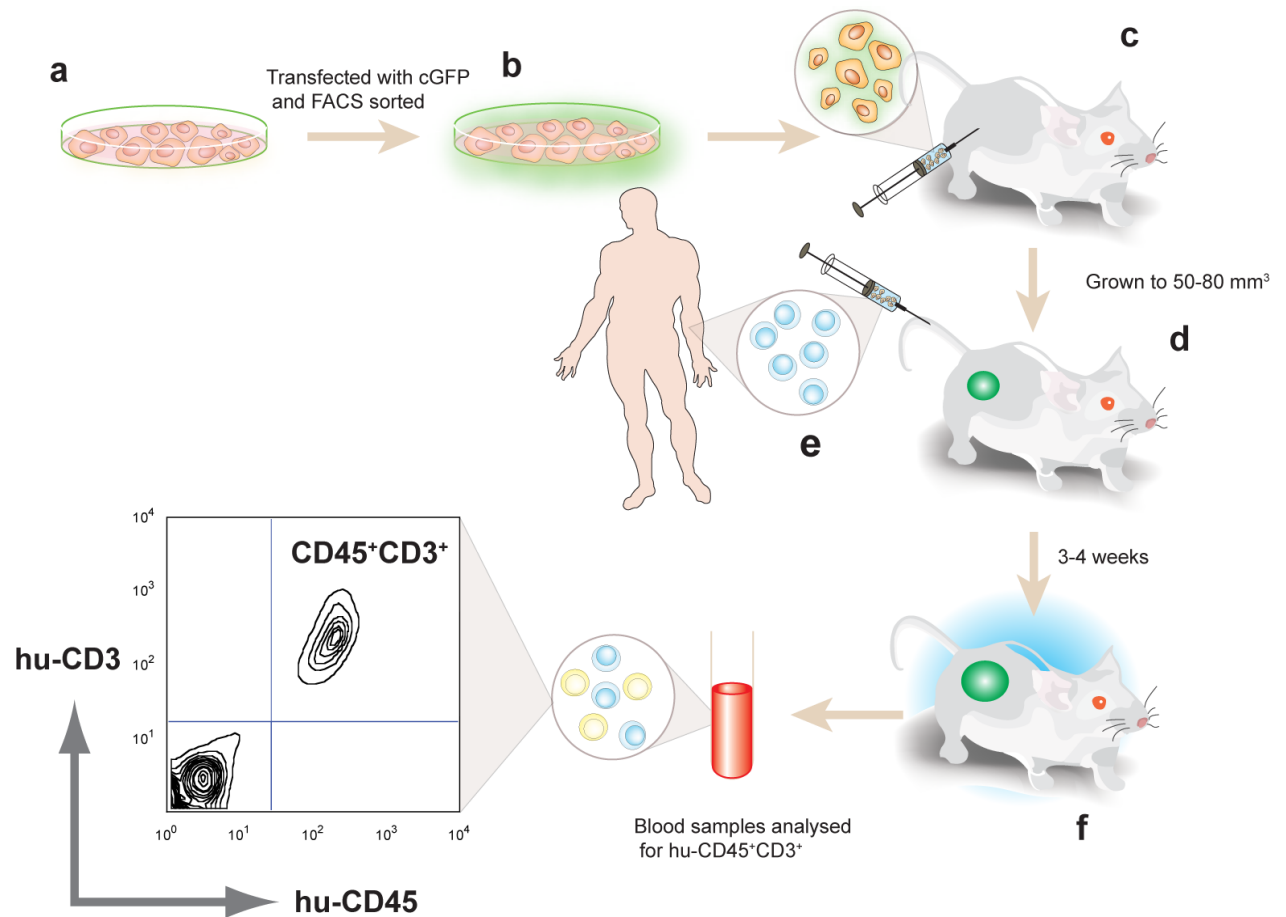

**Supplemental Figure 1: ImmTAC efficacy study design.** (a) J82-NY-ESO<sub>157-165</sub> cells are stably transfected with cGFP expression. (b) Cells are then sorted for high expression of GFP. (c) Mice are injected subcutaneously with  $5 \times 10^6$  J82-NY-ESO<sub>157-165</sub> cells and (d) grown to approximately 50-80 mm<sup>3</sup>. (e) Mice are administered intravenously with  $20 \times 10^6$  PBLs isolated from a healthy donor and permitted to engraft over 3-4 weeks after which time (f) blood samples are analysed by flow cytometry for the presence of human CD45<sup>+</sup>CD3<sup>+</sup> cells.

## Supplemental Figure 2

**Group 1: ImmTAC-NYE**  
QDx5 (0.04 mg/kg; i.v.)

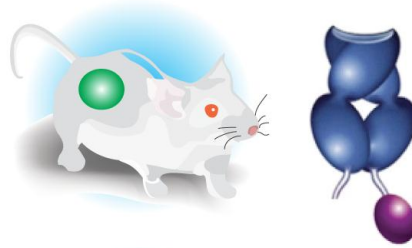

**Group 2: ImmTAC-GAG**  
QDx5 (0.04 mg/kg; i.v.)

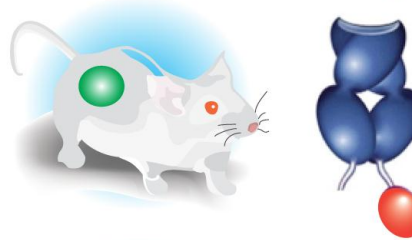

**Group 3: Physiological Control**  
QDx5 (Equiv. volume; i.v.)

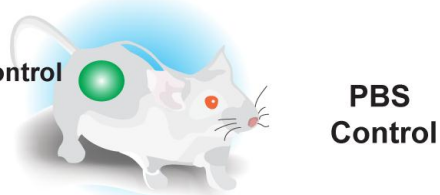

**Treatment  
Schedule**

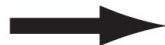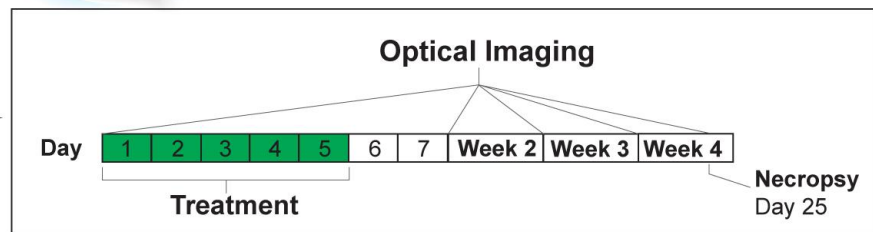

**Supplemental Figure 2:** ImmTAC efficacy study treatment and imaging schedule. Mice ( $n = 12$ ) xenografted bilaterally with J82-NY-ESO<sub>157-165</sub><sup>GFP</sup> and human PBL were randomised by tumour volume, % human CD45<sup>+</sup>CD3<sup>+</sup> cells and GFP fluorescence and treated with ImmTAC-NYE ( $n = 4$ ), ImmTAC-GAG ( $n = 4$ ), or PBS control on Day 1-5 as indicated. Imaging was performed prior to imaging and on days 7, 14, 21 and at termination of the study on day 25.

## Supplemental Table 1

| <u>Cells</u>    | <u>Cell Type</u>                       | <u>Transcript</u> |                 |           |                |           |
|-----------------|----------------------------------------|-------------------|-----------------|-----------|----------------|-----------|
|                 |                                        | <u>Reference</u>  | <u>NY-ESO-1</u> |           | <u>LAGE-1</u>  |           |
|                 |                                        | <u>Avg. Ct.</u>   | <u>Avg. Ct</u>  | <u>RQ</u> | <u>Avg. CT</u> | <u>RQ</u> |
| A375            | Melanoma (Reference sample)            | 24.8*             | 23.35           | 1.0       | 33.01          | 1.0       |
| HNPCEpIC (CIL1) | Ciliary epithelial cells               | 25.1*             | ND              | ND        | ND             | ND        |
| HDMEC2          | Dermal microvascular endothelial cells | 23.9*             | ND              | ND        | ND             | ND        |
| HDMEC3          | Dermal microvascular endothelial cells | 16.4**            | ND              | ND        | ND             | ND        |
| HDF1            | Dermal fibroblasts                     | 23.7*             | ND              | ND        | ND             | ND        |
| HPF1            | Pulmonary fibroblasts                  | 24.7*             | ND              | ND        | ND             | ND        |
| HRPEpIC (HRP1)  | Retinal pigmented epithelial cells     | 24.2*             | ND              | ND        | ND             | ND        |
| REpIC (REN2)    | Renal epithelial cells                 | 24.5*             | ND              | ND        | ND             | ND        |
| HA3             | Astrocytes                             | 25*               | ND              | ND        | ND             | ND        |
| HA2             | Astrocytes                             | 19.4**            | ND              | ND        | ND             | ND        |
| HAoEC1          | Aortic endothelial cells               | 24.9*             | ND              | ND        | ND             | ND        |
| HNEM N10        | Epidermal melanocyte                   | 34.9**            | ND              | ND        | ND             | ND        |
| HNEM N5         | Epidermal melanocyte                   | 17.2**            | ND              | ND        | ND             | ND        |
| HNEM N3         | Epidermal melanocyte                   | 17.9**            | ND              | ND        | ND             | ND        |
| HEP2            | Human Hepatocytes                      | 15.5**            | ND              | ND        | ND             | ND        |
| SMC3            | Normal human smooth muscle cells       | 15.3**            | ND              | ND        | 36.8           | 0.002     |

Supplemental table 1: Expression of NY-ESO-1 and LAGE-1 in primary normal tissues: \*Gus-B; \*\*b-actin.  
 ND: Not detected

**Supplemental Table 2**

| Cell line | Cell Type                   | Transcript      |                |           |                |           |
|-----------|-----------------------------|-----------------|----------------|-----------|----------------|-----------|
|           |                             | Reference       | NY-ESO-1       |           | LAGE-1         |           |
|           |                             | <u>Avg. Ct.</u> | <u>Avg. Ct</u> | <u>RQ</u> | <u>Avg. CT</u> | <u>RQ</u> |
| A375      | Melanoma (Reference sample) | 18.9**          | 22.1           | 1.000     | 31.2           | 1.000     |
| Mel 38    | Melanoma                    | 19.5**          | 21.2           | 2.9       | 24.5           | 150.3     |
| H929      | Multiple myeloma            | 17.8**          | 25.0           | 0.08      | 29.1           | 1.51      |
| EJM       | multiple myeloma            | 23.7*           | 22.2           | 1.1       | 22.8           | 541.1     |
| H1975     | Non-small cell lung cancer  | 15.0**          | 35.5           | 0.00001   | 37.4           | 0.001     |
| H226      | Lung squamous carcinoma     | 15.9**          | 37.7           | 0.000003  | ND             | ND        |
| OV79      | Ovarian carcinoma           | 15.1**          | 35.9           | 0.00001   | 34.4           | 0.007     |
| NALM-6    | Pre- B cell leukemia        | 17.3**          | 36.7           | 0.00002   | 35.4           | 0.02      |
| M108      | Mesothelioma                | 16.6**          | ND             | ND        | 37.2           | 0.003     |
| LnCAP     | Prostate cancer             | 20**            | 36.7           | 0.00010   | 34.5           | 0.147     |
| PC3       | Prostate cancer             | 16.6**          | ND             | ND        | ND             | ND        |
| PP        | EBV transformed B cell line | 14.7**          | ND             | ND        | ND             | ND        |
| VERD      | EBV transformed B cell line | 16.9**          | ND             | ND        | ND             | ND        |
| Colo205   | Colon carcinoma             | 20.8**          | ND             | ND        | ND             | ND        |
| HCT116    | Colorectal carcinoma        | 21.4**          | ND             | ND        | ND             | ND        |

Supplemental table 2: Expression of NY-ESO-1 and LAGE-1 in established tumor cell lines. \*Gus-B; \*\*b actin.

ND: Not detected

### Supplemental Table 3

| <u>Epitope</u>      | <u>Antigen</u>       | <u>KD</u>   |
|---------------------|----------------------|-------------|
| HLA-A2 - SLLMWITQC  | NY-ESO               | 48 pM       |
| HLA-A2 - KIFGSLAFL  | Her-2/Neu            | no binding* |
| HLA-A2 - ALGSTAPPV  | MUC-1                | no binding* |
| HLA-A2 - LLGDLFGV   | hMDM-2               | no binding* |
| HLA-A2 - YLQVNSLQTV | Telomerase (988-997) | no binding* |
| HLA-A2 - LTLGEFLKL  | Proteinase PRI       | no binding* |
| HLA-A2 - ILLRDAGLV  | TRAG-3               | no binding* |
| HLA-A2 - ALQPGTALL  | PSCA                 | no binding* |
| HLA-A2 - LLHETDSAV  | PSMA                 | no binding* |
| HLA-A2 - YMDGTMSQV  | Tyrosinase           | no binding* |
| HLA-A2 - ELAGIGILTV | Melan-A              | no binding* |
| HLA-A2 - YLSGANLNL  | CEA                  | no binding* |
| HLA-A2 - NLVPMVATV  | CMV                  | no binding* |
| HLA-A2 - RMFPNAPYL  | WT-1 (126-134)       | no binding* |
| HLA-A2 - ILAKFLHWL  | Telomerase (540-548) | no binding* |

Supplemental table 3: Binding of TCR-NYE-(0.048 nM) to purified HLA-A2-peptides measured by Surface Plasmon Resonance (SPR).

\* Limit of detection for SPR binding is approximately  $K_D$ 500 $\mu$ M.

**Supplemental Table 4**

|                           | <b>Group</b> (% human CD45 <sup>+</sup> CD3 <sup>+</sup> ) |            |            |
|---------------------------|------------------------------------------------------------|------------|------------|
| <b>Mouse no.</b>          | PBS                                                        | ImmTAC-GAG | ImmTAC-NYE |
| 1                         | 12.4                                                       | 22.3       | 19.8       |
| 2                         | 16.2                                                       | 21.4       | 16.1       |
| 3                         | 24.7                                                       | 14.7       | 12.9       |
| 4                         | 18.1                                                       | 10.2       | 20.1       |
| Mean ± SD                 | 17.9 ± 5.1                                                 | 17.1 ± 5.7 | 17.2 ± 3.4 |
| One-way ANOVA $p = 0.975$ |                                                            |            |            |

Supplemental table 4: Percentage human CD45<sup>+</sup>CD3<sup>+</sup> chimerism in J82-NY-ESO<sub>157-165</sub><sup>GFP</sup> at study initiation.
